# Supplementary material for: High hydrogen production in the InSe/MoSi2N4van der Waals heterostructure for overall water splitting
Source: Royal Society of Chemistry journal article supplement (doi:10.1039/d1cp04705a), 2021-12-23
Supplement: d1cp04705a1.pdf [file d1cp04705a1.pdf]

## Electronic supplementary information (ESI)

### High hydrogen production in InSe/MoSi<sub>2</sub>N<sub>4</sub> van der Waals heterostructure for overall water splitting

Yong He,<sup>a</sup> Yao-hui Zhu,<sup>\*b</sup> Min Zhang,<sup>\*c</sup> Juan Du,<sup>a</sup> Wen-hui Guo,<sup>a</sup> Shi-ming Liu,<sup>a</sup>  
Chong Tian,<sup>a</sup> Hong-xia Zhong,<sup>d</sup> Xinqiang Wang<sup>a</sup> and Jun-jie Shi<sup>\*a</sup>

<sup>a</sup> State Key Laboratory for Artificial Microstructures and Mesoscopic Physics, School of Physics, Peking University Yangtze Delta Institute of Optoelectronics, Peking University, Beijing 100871, China.

<sup>b</sup> Physics Department, Beijing Technology and Business University, Beijing 100048, China.

<sup>c</sup> Inner Mongolia Key Laboratory for Physics and Chemistry of Functional Materials, College of Physics and Electronic Information, Inner Mongolia Normal University, Hohhot 010022, China.

<sup>d</sup> School of Mathematics and Physics, China University of Geosciences, Wuhan 430074, China.

Corresponding E-mail: [zhuyaohui@th.btbu.edu.cn](mailto:zhuyaohui@th.btbu.edu.cn) (Y-h Zhu); [zhangm@imnu.edu.cn](mailto:zhangm@imnu.edu.cn) (M. Zhang); [jjshi@pku.edu.cn](mailto:jjshi@pku.edu.cn) (J-j Shi)

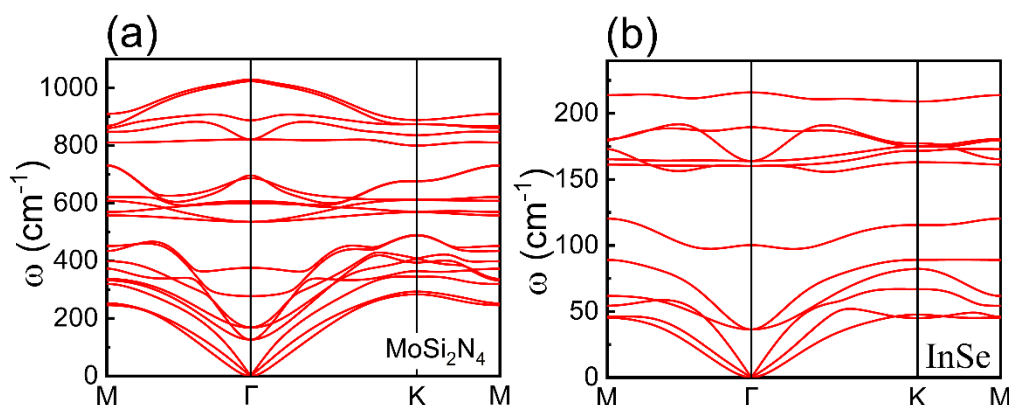

**Fig. S1** Calculated phonon spectra of (a) MoSi<sub>2</sub>N<sub>4</sub> and (b) InSe layers, respectively.

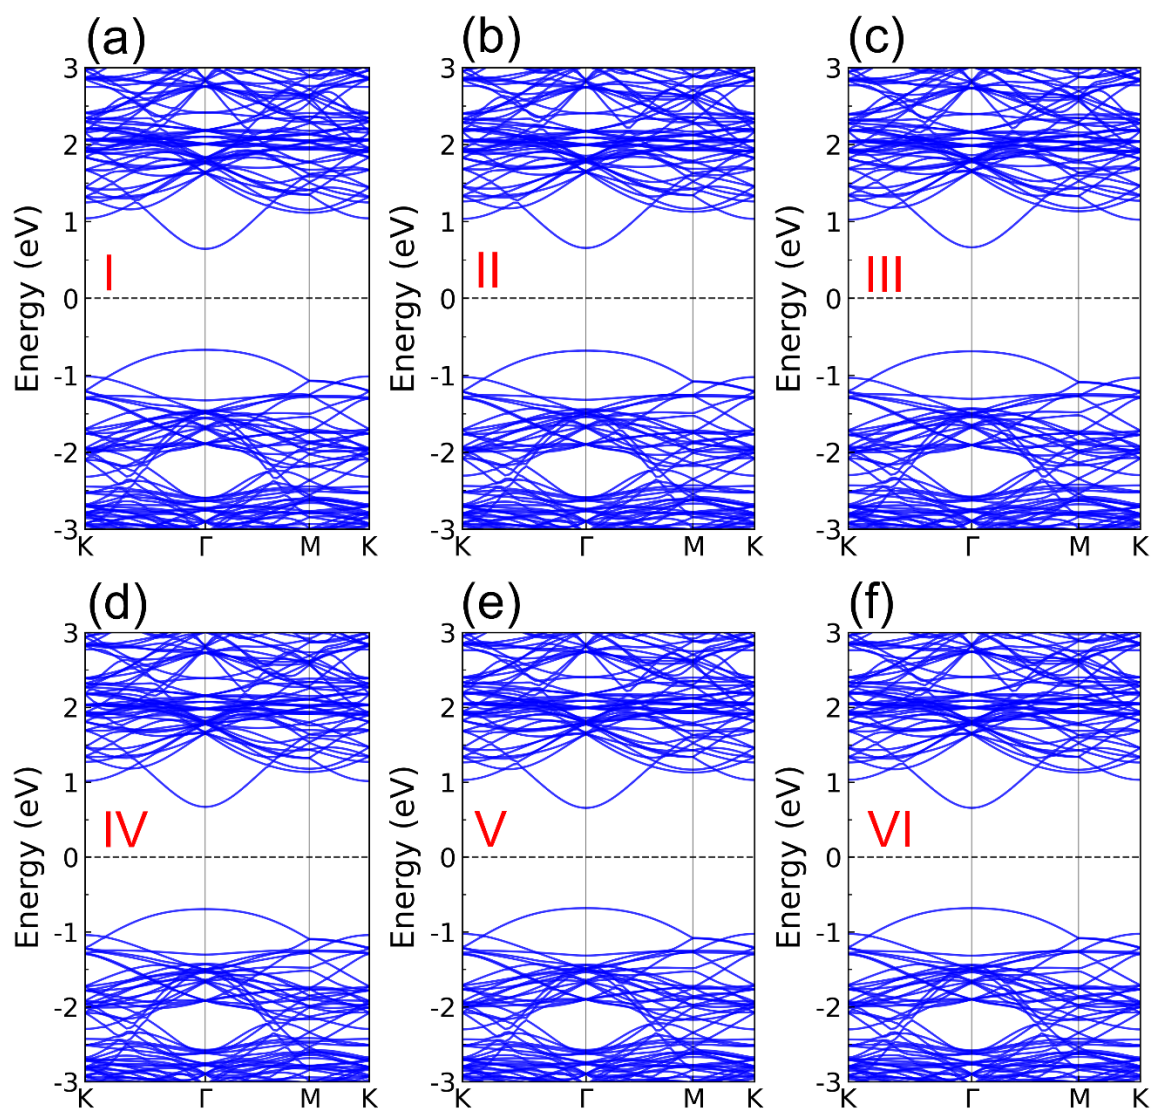

**Fig. S2** Calculated band structures (PBE method) of six different stacking configurations for InSe/MoSi<sub>2</sub>N<sub>4</sub> heterostructures.

**Table S1** The lattice constants  $a/b$ , interlayer distance  $d$ , buckling height of InSe  $h_1$  and MoSi<sub>2</sub>N<sub>4</sub>  $h_2$ , formation energy  $E_f$  and band gap  $E_g^{\text{PBE}}$  of InSe/MoSi<sub>2</sub>N<sub>4</sub> heterostructure

|     | $a/b$ (Å) | $d$ (Å) | $h_1$ (Å) | $h_2$ (Å) | $E_f$ (meV/atom) | $E_g^{\text{PBE}}$ (eV) |
|-----|-----------|---------|-----------|-----------|------------------|-------------------------|
| I   | 10.480    | 3.311   | 5.429     | 6.993     | -14.965          | 1.342                   |
| II  | 10.479    | 3.284   | 5.426     | 6.992     | -15.012          | 1.335                   |
| III | 10.480    | 3.326   | 5.460     | 6.991     | -15.005          | 1.352                   |
| IV  | 10.479    | 3.282   | 5.445     | 6.980     | -15.000          | 1.365                   |
| V   | 10.480    | 3.293   | 5.452     | 6.993     | -14.975          | 1.338                   |
| VI  | 10.479    | 3.286   | 5.455     | 6.974     | -15.022          | 1.339                   |
